# Supplementary material for: Comparison of phytochemical composition of Ginkgo biloba extracts using a combination of non-targeted and targeted analytical approaches
Source: PubMed Central journal article supplement (PMC7496025; doi:10.1007/s00216-020-02839-7), 2020-08-31
Supplement: 216_2020_2839_MOESM1_ESM.pdf [file 216_2020_2839_MOESM1_ESM.pdf]

**Analytical and Bioanalytical Chemistry**

**Electronic Supplementary Material**

**Comparison of phytochemical composition of *Ginkgo biloba* extracts using a combination of non-targeted and targeted analytical approaches**

Bradley J. Collins, Season Kerns, Kristin Aillon, Geoffrey Mueller, Cynthia V. Rider,  
Eugene F. DeRose, Robert E. London, James Harnly, Suramya Waidyanatha

## Supplementary Tables

**Table S1** Information for *Ginkgo biloba* Extract Products Procured from Various Suppliers

| GbE ID | Supplier | Supplier Chemical Name             | Supplier Lot  | Sample Type        | Supplier COA               |
|--------|----------|------------------------------------|---------------|--------------------|----------------------------|
| A      | 1        | Ginkgo biloba P.E. 24%             | Gbo20140907-2 | Unfinished Product | Flavonols 24%              |
| B      | 1        | Ginkgo biloba P.E. 10:1            | Gbo20140907-4 | Unfinished Product | Extract Ratio              |
| C      | 1        | Ginkgo biloba P.E. 4:1             | Gbo20140907-3 | Unfinished Product | Extract Ratio              |
| D      | 2        | Ginkgo biloba P.E. 24/6            | CMYX-A-01272  | Unfinished Product | Flavonols 24%, Terpenes 6% |
| E      | 3        | Ginkgo biloba Leaves PE 24/6       | B408017       | Unfinished Product | Flavonols 24%, Terpenes 6% |
| F      | 4        | Ginkgo biloba P.E. 24%             | Gbo2014032    | Unfinished Product | Flavonols 24%              |
| G      | 5        | Ginkgo biloba Leaf Powder          | CYX-A-00590   | Unfinished Product | None                       |
| H      | 5        | Ginkgo biloba Leaf Extract<br>4:1  | CYX20120201   | Unfinished Product | Extract Ratio              |
| I      | 5        | Ginkgo biloba P.E. 24/6            | GB2014818     | Unfinished Product | Flavonols 24%, Terpenes 6% |
| J      | 6        | PureLeaf™ Ginkgo biloba<br>Extract | EN-140426     | Unfinished Product | None                       |
| K      | 7        | Ginkgo biloba Dry Extract          | 478131        | Unfinished Product | None                       |
| L      | 8        | Ginkgo biloba EPG 246              | 60814002      | Unfinished Product | Flavonols 24%, Terpenes 6% |
| M      | 9        | Ginkgo biloba PE 4:1               | C276/086/A14  | Unfinished Product | Extract Ratio              |
| N      | 9        | Ginkgo Leaf PE 24% Flavone         | D072/030/A14  | Unfinished Product | Flavonols 24%, Terpenes 6% |

|   |      |                                                                           |               |                    |                                                    |
|---|------|---------------------------------------------------------------------------|---------------|--------------------|----------------------------------------------------|
|   |      | Glycosides / 6% Ginkgolides                                               |               |                    |                                                    |
| O | 10   | Ginkgo biloba Extract 24/6                                                | 1212134       | Unfinished Product | Flavonols 24%, Terpenes 6%                         |
| P | 11   | Ginkgo biloba Powder Extract                                              | O-140303      | Unfinished Product | None                                               |
| Q | 12   | Ginkgo Extract                                                            | RMGK-090614   | Unfinished Product | None                                               |
| R | 13   | Ginkgo biloba Extract 24/6                                                | GIN24D-140610 | Unfinished Product | Flavonols 24%, Terpenes 6%                         |
| S | 14   | Ginkgo biloba Extract USP                                                 | 20131205      | Unfinished Product | ?                                                  |
| T | 15   | Ginkgo 24/6/5                                                             | 14090785      | Unfinished Product | Flavonols 24%, Terpenes 6%                         |
| U | NIST | Ginkgo biloba (Extract)                                                   | SRM 3247      | SRM                | Flavonols 24%, Terpenes 6%,<br>Ginkgolic Acids <1% |
| V | NIST | Ginkgo-Containing Tablets                                                 | SRM 3248      | SRM                | Flavonols 24%, Terpenes 6%,<br>Ginkgolic Acids <1% |
| W | 16   | Ginkgo Standardized (60 mg GbE per capsule; 340 mg Gotu Kola per capsule) | 20009556      | Finished Product   | Flavonols 24% Terpenes 6%<br>Ginkgolic Acids <1%   |
| X | 16   | Ginkgold tablets (60 mg GbE per tablet)                                   | 20031047      | Finished Product   | Flavonols 24%, Terpenes 6%,<br>Ginkgolic Acids <1% |
| Y | 16   | Ginkgold MAX tablets (120 mg GbE per tablet)                              | 20024869      | Finished Product   | Flavonols 24%, Terpenes 6%,<br>Ginkgolic Acids <1% |
| Z | 16   | Ginkgold MAX tablets (120 mg GbE per tablet)                              | 20031396      | Finished Product   | Flavonols 24%, Terpenes 6%,<br>Ginkgolic Acids <1% |

**Table S2** Summary of Linear Regression Parameters for HPLC Component Standard Curves

| Analyte            | Correlation Coefficient (r) | Effective Curve Range <sup>1</sup> (~ µg/mL) | Nominal LOD <sup>2</sup> (Wt%; g/g) | Nominal LOQ <sup>3</sup> (Wt%; g/g) |
|--------------------|-----------------------------|----------------------------------------------|-------------------------------------|-------------------------------------|
| Bilobalide         | ≥ 0.99                      | 11.4 – 64.6                                  | 0.32                                | 1.44                                |
| Ginkgolide A       | ≥ 0.99                      | 10.6 – 54.8                                  | 0.21                                | 1.33                                |
| Ginkgolide B       | ≥ 0.99                      | 10.3 – 56.8                                  | 0.19                                | 1.28                                |
| Ginkgolide C       | ≥ 0.99                      | 10.7 – 55.2                                  | 0.13                                | 1.34                                |
| Ginkgolide J       | ≥ 0.99                      | 12.6 – 53.6                                  | 0.30                                | 1.58                                |
| Rutin              | ≥ 0.999                     | 3.82 – 72.3                                  | 0.003                               | 0.48                                |
| Quercetin          | ≥ 0.999                     | 4.31 – 76.0                                  | 0.004                               | 0.54                                |
| Kaempferol         | ≥ 0.999                     | 4.54 – 80.6                                  | 0.01                                | 0.72                                |
| Isorhamnetin       | ≥ 0.99                      | 2.32 – 35.5                                  | 0.01                                | 0.35                                |
| Ginkgolic Acid C15 | ≥ 0.99                      | 1 - 500                                      | 0.00002                             | 0.00007                             |
| Ginkgolic Acid C17 | ≥ 0.99                      | 1 - 500                                      | 0.00001                             | 0.00019                             |
| Ginkgotoxin        | ≥ 0.9999                    | 10 – 2,000                                   | 0.00006                             | 0.00659                             |

Criteria:  $r \geq 0.99$ ; %RE  $\leq 25\%$

<sup>1</sup> The Effective Curve Range was determined by calculating the mean across all analysis days.

<sup>2</sup> Nominal LOD = 3 x signal to noise ratio of the blank chromatogram at or near the retention time of the GbE constituent, expressed as Wt%; g/g.

<sup>3</sup> Nominal LOQ = The nominal value of the lowest concentration standard expressed as Wt%; g/g.

**Table S3** Percent by Weight of Hydrolyzed GbE Constituents Quantitated by HPLC

| Source/Type <sup>1</sup> | GbE ID          | Bilobalide  | Terpene Trilactones |             |      |             | Rutin       | Flavonols <sup>1</sup> |             |              |
|--------------------------|-----------------|-------------|---------------------|-------------|------|-------------|-------------|------------------------|-------------|--------------|
|                          |                 |             | A                   | B           | C    | J           |             | Quercetin              | Kaempferol  | Isorhamnetin |
| NTP UFP                  | I               | 7.95        | 4.22                | 1.62        | 1.89 | <b>1.03</b> | 0.71        | 6.00                   | 4.19        | 0.59         |
| NTP UFP                  | 1A              | 7.86        | 3.94                | 1.57        | 1.97 | <b>1.09</b> | 0.85        | 5.80                   | 4.04        | 0.53         |
| NTP UFP                  | 1A <sup>3</sup> | 8.73        | 4.90                | 2.19        | 1.80 | 2.42        | ND          | 6.56                   | 3.86        | 1.06         |
| NTP UFP                  | 1F              | 7.95        | 4.26                | 1.66        | 2.07 | <b>1.13</b> | 0.78        | 5.84                   | 4.07        | 0.53         |
| 1 UFP                    | A               | <b>1.28</b> | ND                  | ND          | ND   | 1.77        | BLOD        | 1.62                   | <b>0.09</b> | <b>0.17</b>  |
| 1 UFP                    | B               | ND          | ND                  | ND          | ND   | ND          | <b>0.05</b> | 1.21                   | <b>0.08</b> | <b>0.15</b>  |
| 1 UFP                    | C               | ND          | ND                  | ND          | ND   | ND          | <b>0.01</b> | 0.94                   | <b>0.07</b> | <b>0.14</b>  |
| 2 UFP                    | D               | <b>1.28</b> | 2.60                | 1.60        | 2.79 | <b>1.18</b> | 1.11        | 3.77                   | 3.35        | <b>0.20</b>  |
| 3 UFP                    | E               | 1.50        | 2.13                | 1.46        | 2.60 | <b>1.21</b> | 1.21        | 4.08                   | 2.37        | <b>0.22</b>  |
| 4 UFP                    | F               | ND          | ND                  | ND          | ND   | ND          | <b>0.04</b> | 1.15                   | <b>0.07</b> | <b>0.14</b>  |
| 5 UFP                    | G               | <b>0.55</b> | <b>0.68</b>         | <b>0.85</b> | ND   | <b>0.82</b> | ND          | ND                     | ND          | ND           |
| 5 UFP                    | H               | ND          | ND                  | ND          | ND   | ND          | ND          | ND                     | ND          | ND           |
| 5 UFP                    | I               | 1.53        | 2.45                | 1.50        | 1.86 | <b>1.08</b> | 0.69        | 5.42                   | 2.15        | <b>0.27</b>  |
| 6 UFP                    | J               | 2.26        | 3.78                | 1.97        | 1.62 | <b>1.08</b> | <b>0.46</b> | 5.23                   | 3.86        | <b>0.30</b>  |
| 7 UFP                    | K               | 3.33        | 2.44                | 1.40        | 1.87 | <b>1.10</b> | 1.37        | 4.13                   | 3.08        | <b>0.28</b>  |
| 8 UFP                    | L               | 3.35        | 2.72                | 1.37        | 1.66 | <b>1.07</b> | 3.20        | 1.54                   | 1.01        | <b>0.25</b>  |

|          |                |             |             |             |             |             |             |      |             |             |
|----------|----------------|-------------|-------------|-------------|-------------|-------------|-------------|------|-------------|-------------|
| 9 UFP    | M              | <b>1.22</b> | ND          | ND          | ND          | ND          | ND          | 0.55 | <b>0.45</b> | <b>0.16</b> |
| 9 UFP    | N              | 1.89        | 4.09        | 1.90        | 1.38        | <b>0.95</b> | 0.59        | 4.69 | 2.67        | <b>0.34</b> |
| 10 UFP   | O              | 2.77        | 2.82        | 1.69        | 1.51        | <b>1.08</b> | <b>0.20</b> | 7.52 | 3.00        | 0.79        |
| 11 UFP   | P              | ND          | <b>0.92</b> | <b>0.78</b> | <b>0.85</b> | ND          | ND          | 2.90 | 8.43        | 0.37        |
| 12 UFP   | Q              | 1.91        | 2.38        | 1.78        | 2.83        | <b>1.22</b> | <b>0.16</b> | 4.79 | 5.32        | 0.63        |
| 13 UFP   | R              | 2.14        | 2.38        | 1.80        | 1.78        | <b>1.00</b> | ND          | 4.09 | 5.31        | 0.51        |
| 14 UFP   | S              | 2.73        | 1.83        | <b>0.96</b> | 1.61        | <b>1.03</b> | <b>0.40</b> | 5.85 | 5.33        | 0.66        |
| 15 UFP   | T              | 2.45        | 2.13        | 1.46        | 1.39        | <b>0.95</b> | 0.64        | 4.37 | 4.82        | 1.82        |
| NIST SRM | U              | 2.75        | 1.71        | <b>1.07</b> | 1.77        | <b>1.08</b> | 1.10        | 4.79 | 4.35        | 0.75        |
| NIST SRM | U <sup>3</sup> | 4.21        | 2.28        | 1.60        | 1.75        | 2.29        | ND          | 4.74 | 3.26        | 0.95        |
| NIST SRM | V              | <b>0.91</b> | <b>0.89</b> | <b>0.72</b> | <b>0.84</b> | <b>0.83</b> | <b>0.21</b> | 0.91 | 0.99        | <b>0.26</b> |
| 16 FP    | W              | 5.55        | 2.96        | 3.50        | 1.74        | <b>1.23</b> | 2.25        | 4.71 | 4.43        | 0.40        |
| 16 FP    | X              | 4.38        | 2.60        | 1.64        | 2.03        | <b>1.15</b> | 2.25        | 4.18 | 3.60        | 0.69        |
| 16 FP    | Y              | 4.60        | 2.71        | 1.45        | 2.11        | <b>1.31</b> | 2.14        | 4.31 | 3.66        | 0.62        |
| 16 FP    | Z              | 4.46        | 2.45        | 1.37        | 1.85        | <b>1.26</b> | 1.92        | 4.64 | 4.01        | 0.63        |

<sup>1</sup>Values reported for quercetin, kaempferol and isorhamnetin are aglycone concentrations. Glycoside values may be obtained by multiplying the quercetin, kaempferol and isorhamnetin values by 2.504, 2.588, and 2.437, respectively. Values listed in bold are below LOQ. See Table S2 for LOQ for each GbE constituent. ND: Not detected; BLOD: Below the limit of detection. See Table S2 for LOD for each GbE constituent.

<sup>2</sup>UPF = Unfinished Product; FP = Finished Product; SRM = Standard Reference Material

<sup>3</sup>Repeat Analysis on a different instrument and on a different day

**Table S4** Weight Percent of Ginkgolic Acids and Ginkgotoxicin in Unhydrolyzed and Hydrolyzed GbE Samples

| Source/Type <sup>2</sup> | GbE             | Unhydrolyzed <sup>1</sup> |                    |                | Hydrolyzed <sup>1</sup> |                    |                |
|--------------------------|-----------------|---------------------------|--------------------|----------------|-------------------------|--------------------|----------------|
|                          |                 | Ginkgolic Acid C15        | Ginkgolic Acid C17 | Ginkgotoxicin  | Ginkgolic Acid C15      | Ginkgolic Acid C17 | Ginkgotoxicin  |
| NTP UFP                  | 1               | 0.00182                   | 0.00021            | 0.00754        | 0.00169                 | <b>0.00018</b>     | 0.00997        |
| NTP UFP                  | 1A              | 0.00171                   | <b>0.00015</b>     | 0.00788        | 0.00159                 | <b>0.00015</b>     | 0.00883        |
| NTP UFP                  | 1A <sup>3</sup> | 0.00128                   | 0.00066            | 0.01008        | 0.00149                 | 0.00052            | 0.01102        |
| NTP UFP                  | 1F              | 0.00160                   | <b>0.00013</b>     | 0.00799        | 0.00154                 | <b>0.00012</b>     | 0.00952        |
| 1 UFP                    | A               | 0.00030                   | 0.00059            | <b>0.00304</b> | 0.00027                 | 0.00045            | <b>0.00388</b> |
| 1 UFP                    | B               | 0.00041                   | 0.00069            | <b>0.00302</b> | 0.00049                 | 0.00075            | <b>0.00394</b> |
| 1 UFP                    | C               | 0.00034                   | 0.00062            | <b>0.00306</b> | 0.00076                 | 0.00102            | <b>0.00391</b> |
| 2 UFP                    | D               | 0.00091                   | 0.00089            | 0.01022        | 0.00059                 | 0.00061            | 0.01000        |
| 3 UFP                    | E               | 0.00010                   | 0.00022            | <b>0.00265</b> | <b>0.00006</b>          | 0.00019            | <b>0.00266</b> |
| 4 UFP                    | F               | 0.00047                   | 0.00076            | <b>0.00283</b> | 0.00108                 | 0.00144            | <b>0.00366</b> |
| 5 UFP                    | G               | 0.12690                   | 0.21393            | <b>0.00393</b> | 0.13550                 | 0.22045            | <b>0.00417</b> |
| 5 UFP                    | H               | 0.00037                   | 0.00053            | 0.00909        | 0.00027                 | 0.00040            | 0.01004        |
| 5 UFP                    | I               | 0.00208                   | 0.00266            | 0.01625        | 0.00161                 | 0.00194            | 0.01694        |
| 6 UFP                    | J               | 0.00036                   | 0.00048            | 0.06146        | 0.00039                 | 0.00047            | 0.05976        |
| 7 UFP                    | K               | 0.00031                   | 0.00027            | 0.08466        | 0.00019                 | <b>0.00013</b>     | 0.08407        |
| 8 UFP                    | L               | BLOD                      | BLOD               | 0.04466        | BLOD                    | BLOD               | 0.04446        |
| 9 UFP                    | M               | 0.00034                   | 0.00045            | 0.01045        | 0.00024                 | 0.00030            | 0.01156        |
| 9 UFP                    | N               | 0.08338                   | 0.05940            | 0.04383        | 0.08201                 | 0.05677            | 0.04341        |
| 10 UFP                   | O               | 0.00048                   | 0.00043            | 0.05262        | 0.00075                 | <b>0.00011</b>     | 0.08991        |
| 11 UFP                   | P               | 0.00045                   | <b>0.00011</b>     | 0.01409        | 0.00045                 | <b>0.00010</b>     | 0.01468        |
| 12 UFP                   | Q               | 0.00115                   | 0.00077            | 0.05065        | 0.00078                 | 0.00042            | 0.06155        |
| 13 UFP                   | R               | 0.00030                   | <b>0.00012</b>     | 0.03211        | 0.00025                 | <b>0.00012</b>     | 0.03850        |
| 14 UFP                   | S               | BLOD                      | BLOD               | 0.06728        | BLOD                    | BLOD               | 0.11083        |

|          |                |                |                |                |         |                |                |
|----------|----------------|----------------|----------------|----------------|---------|----------------|----------------|
| 15 UFP   | T              | <b>0.00002</b> | <b>0.00001</b> | 0.04728        | BLOD    | BLOD           | 0.05039        |
| NIST SRM | U              | 0.00030        | 0.00024        | 0.05585        | 0.00012 | <b>0.00010</b> | 0.05304        |
| NIST SRM | U <sup>3</sup> | 0.00028        | 0.00026        | 0.03779        | 0.00019 | <b>0.00015</b> | 0.03879        |
| NIST SRM | V              | BLOD           | BLOD           | 0.01047        | BLOD    | BLOD           | <b>0.01032</b> |
| 16 FP    | W              | <b>0.00002</b> | <b>0.00003</b> | 0.04542        | BLOD    | BLOD           | 0.04291        |
| 16 FP    | X              | BLOD           | BLOD           | <b>0.00483</b> | BLOD    | BLOD           | <b>0.00030</b> |
| 16 FP    | Y              | BLOD           | BLOD           | <b>0.00392</b> | BLOD    | BLOD           | BLOD           |
| 16 FP    | Z              | BLOD           | BLOD           | <b>0.00425</b> | BLOD    | BLOD           | BLOD           |

<sup>1</sup>Values listed in bold are below LOQ but above the limit of detection. See Table S2 for LOQ for each GbE constituent.

BLOD: Below the limit of detection. See Table S2 for the LOD for each GbE. constituent

<sup>2</sup>UFP = Unfinished Product; FP = Finished Product; SRM = Standard Reference Material

<sup>3</sup>Repeat Analysis on a different instrument and on a different day

**Table S5** Comparison of Found vs. Reported GbE Constituents Concentrations in Hydrolyzed NIST SRM

|                                 | Bilobalide<br>(mg/g) | Ginkgolides (mg/g) |      |      |      | Flavonols (mg/g) |            |              |
|---------------------------------|----------------------|--------------------|------|------|------|------------------|------------|--------------|
|                                 |                      | A                  | B    | C    | J    | Quercetin        | Kaempferol | Isorhamnetin |
| NIST 3247<br>Reported<br>Values | 28.5                 | 11.6               | 5.92 | 12.4 | 3.9  | 45.1             | 40.8       | 10.8         |
| Sample U                        | 27.5                 | 17.1               | 10.7 | 17.7 | 10.8 | 47.9             | 43.5       | 7.5          |
| Sample U <sup>1</sup>           | 42.1                 | 22.8               | 16.0 | 17.5 | 22.9 | 47.4             | 32.6       | 9.5          |

<sup>1</sup>Duplicate sample run on a different instrument and on a different day.



## Supplementary Figures

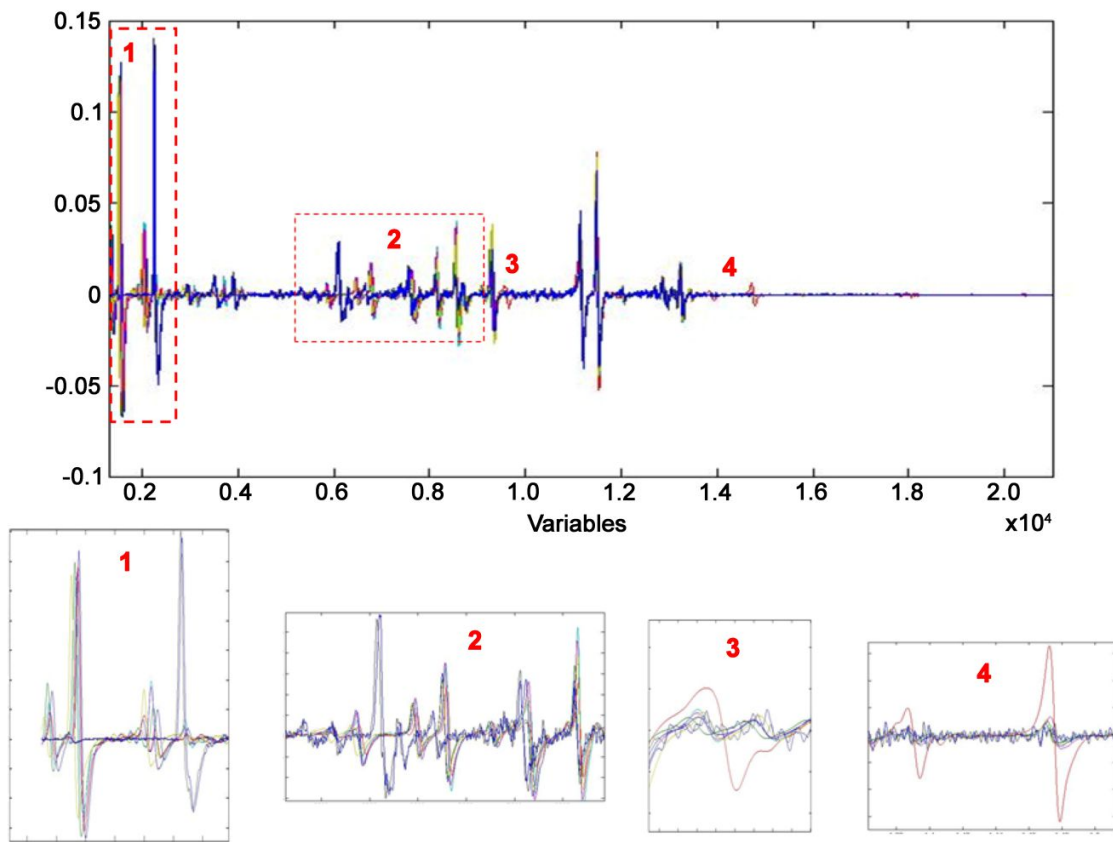

**Fig. S1** Chromatograms for the 8 samples in cluster A (samples U, V, W, X, Y, Z, 1, and 1F)

Insets 1 and 2 highlight the differences between the NIH archived samples and the rest of the samples

Insets 3 and 4 highlight the difference between sample W and the rest of the samples.

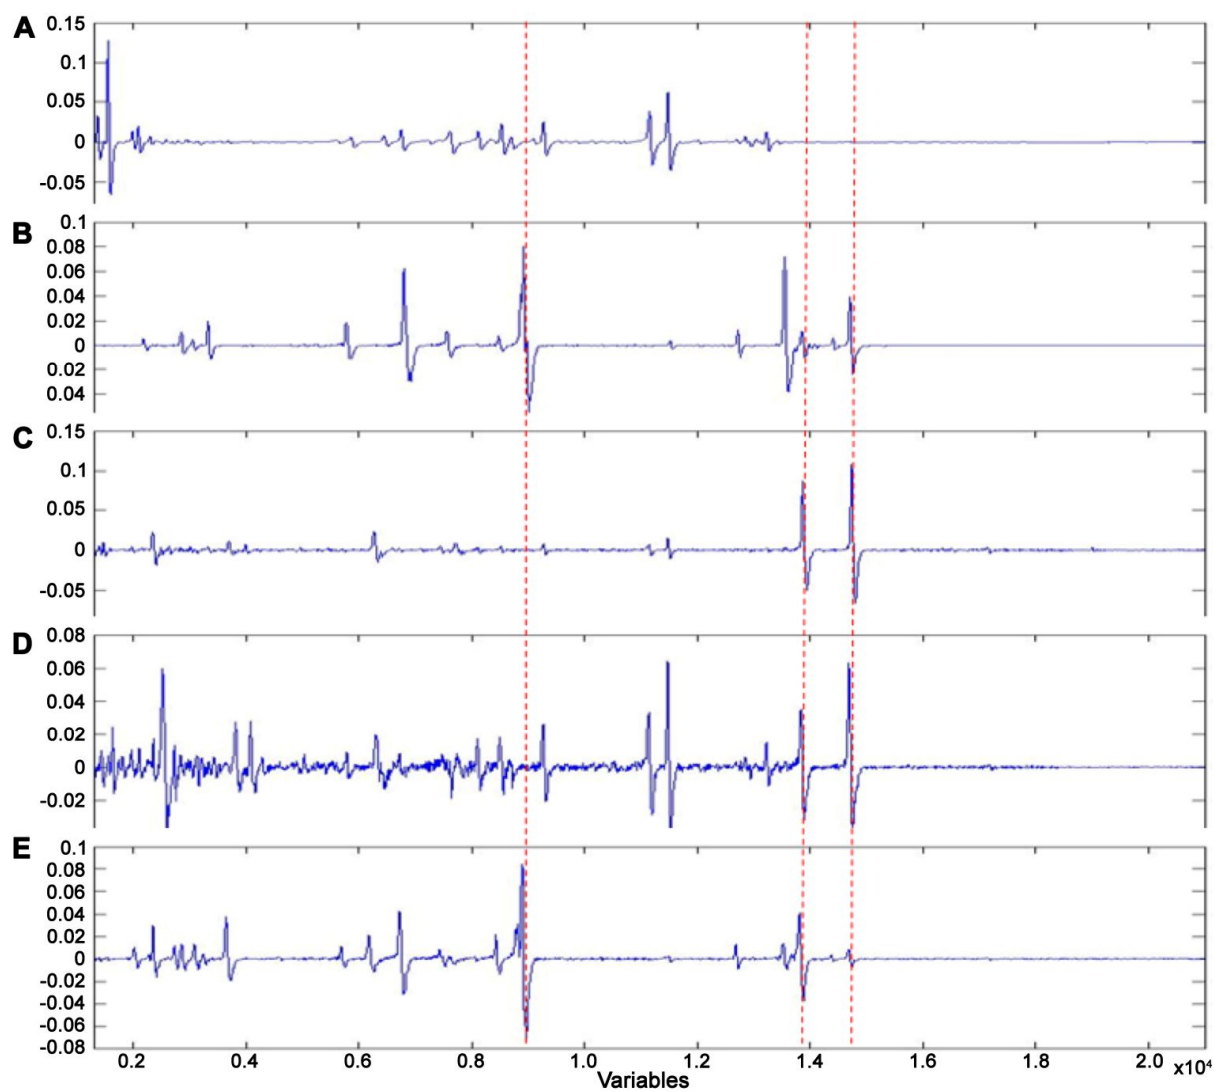

**Fig. S2** Chromatograms for a sample from each cluster in Figure 1A: (A) sample U from cluster A, (B) sample P from cluster B, (C) sample J from cluster C, (D) sample K from cluster D, and (E) sample D from cluster E

Differences in the sample composition are emphasized by the vertical dashed lines

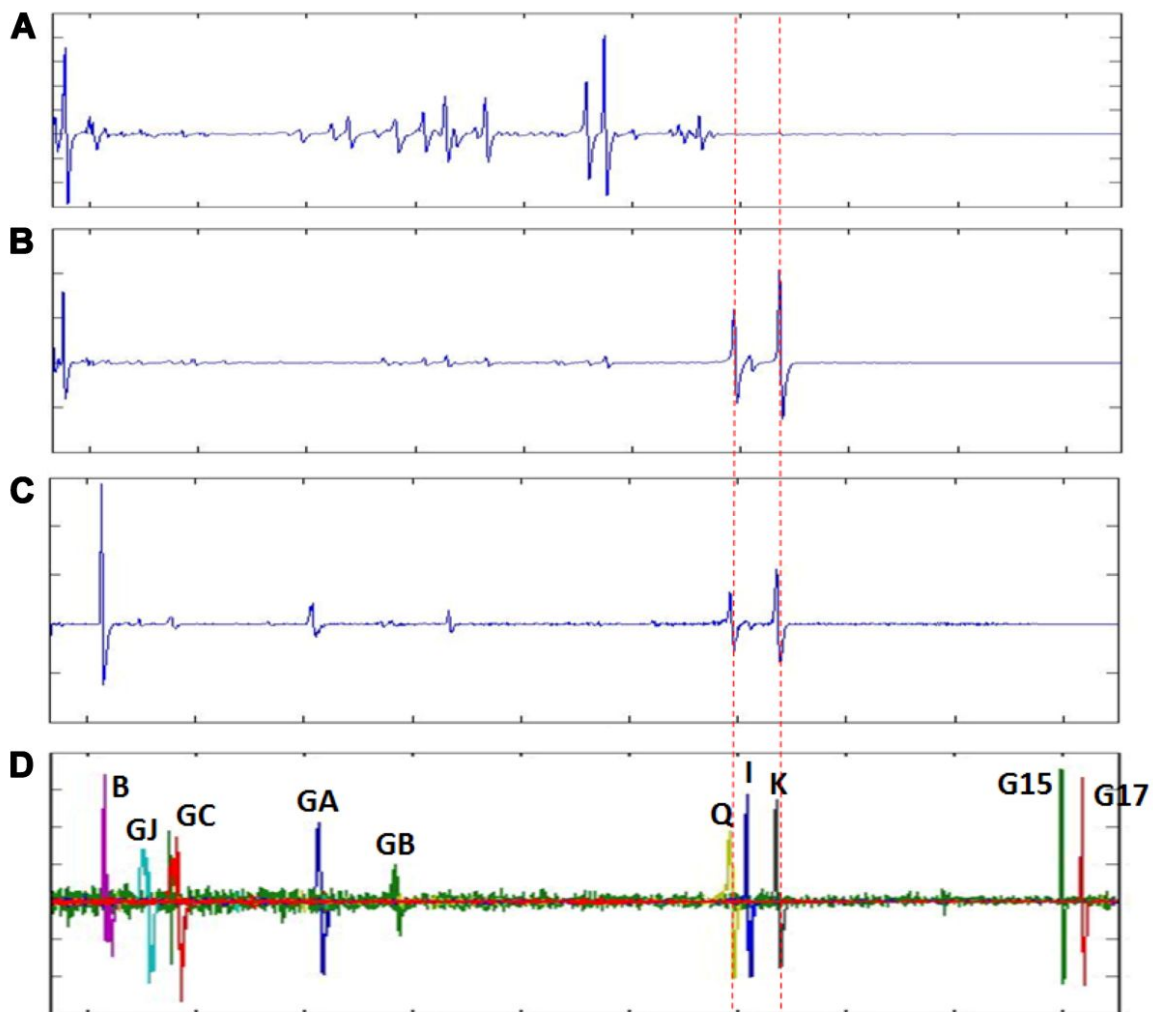

**Fig. S3** Chromatograms illustrating the difference in sample composition induced by hydrolysis: (A) averaged, un-hydrolyzed chromatogram for samples U, V, X, Y, and Z, (B) averaged, hydrolyzed chromatogram for samples U, V, X, Y, and Z, (C) averaged, hydrolyzed chromatogram for samples 1 and 1F, and (D) combined chromatograms for reference standards. Notations for the standards are B=bilobalide, GA=ginkgolide A, GB=ginkgolide B, GC=ginkgolide C, GJ=ginkgolide J, Q=quercetin, I=isorhamnetin, K=kaempferol, G15=ginkgolic acid 15, and G17=ginkgolic acid 17. The vertical dashed lines denote the retention times for quercetin and kaempferol.

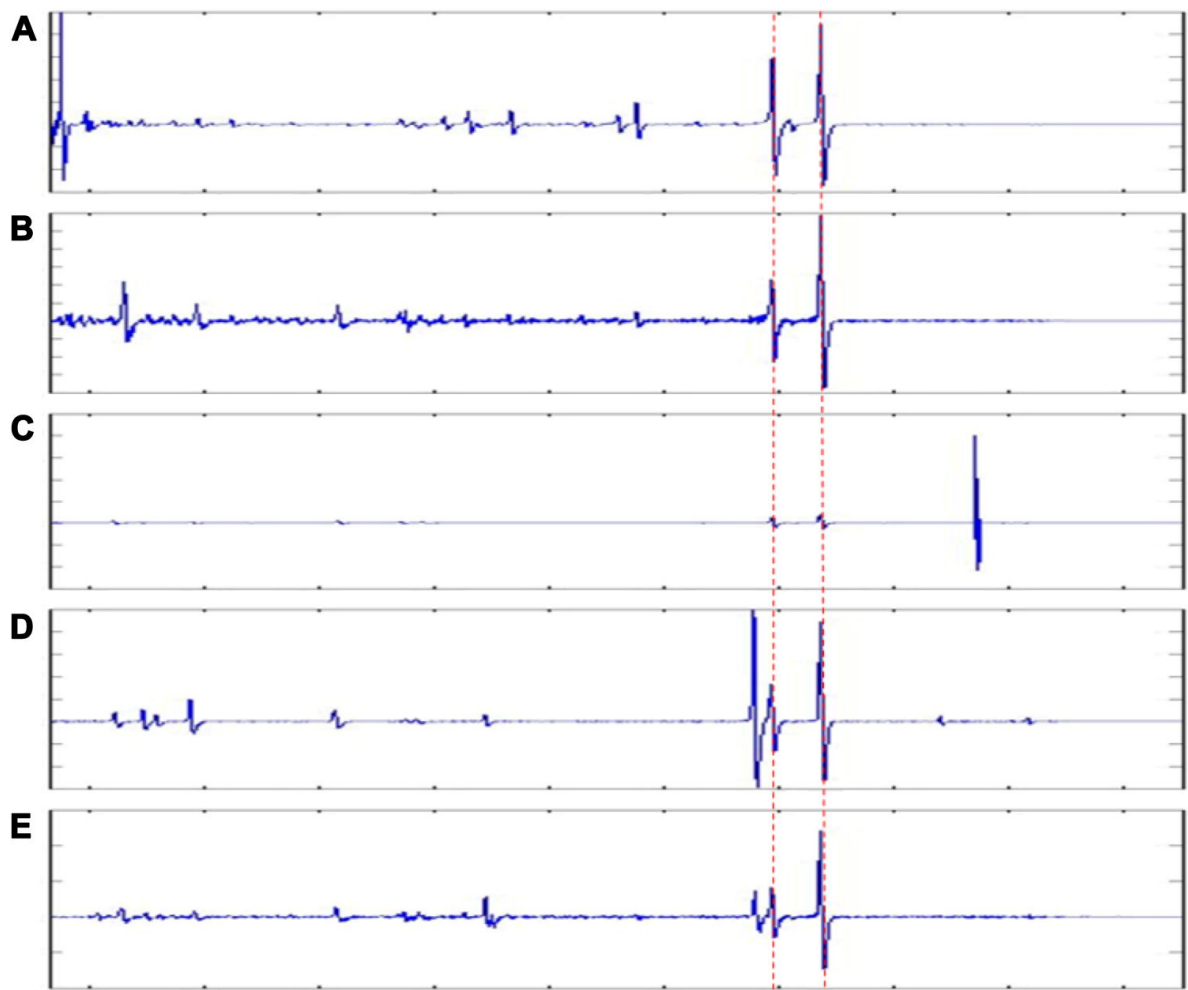

**Fig. S4** Chromatograms for a sample from each group in Figure 1B: (A) sample U, (B) sample K, (C) sample J, (D) sample D, and (E) sample R

The vertical dashed lines denote the retention times for quercetin and kaempferol

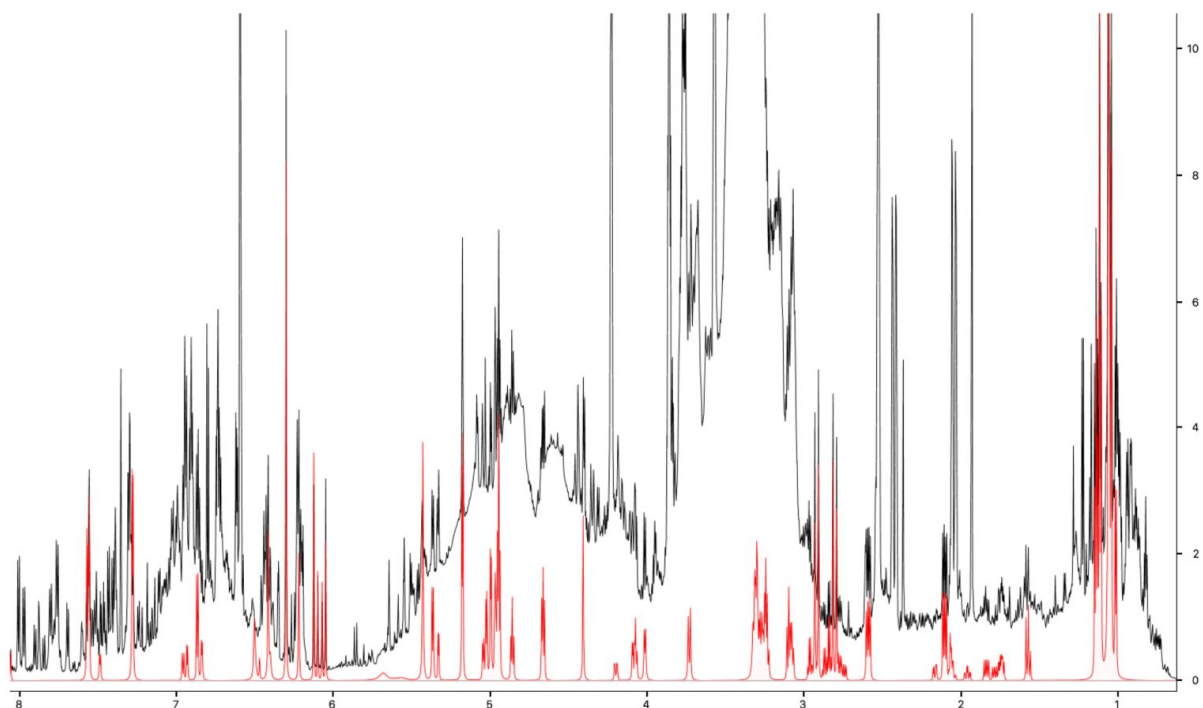

**Fig. S5** Example NMR analysis of GbE-U

Black lines indicate the NMR spectra, and red lines indicate standard compounds fit in the data

X-axis is  $^1\text{H}$  ppm, and the y-axis is relative intensity

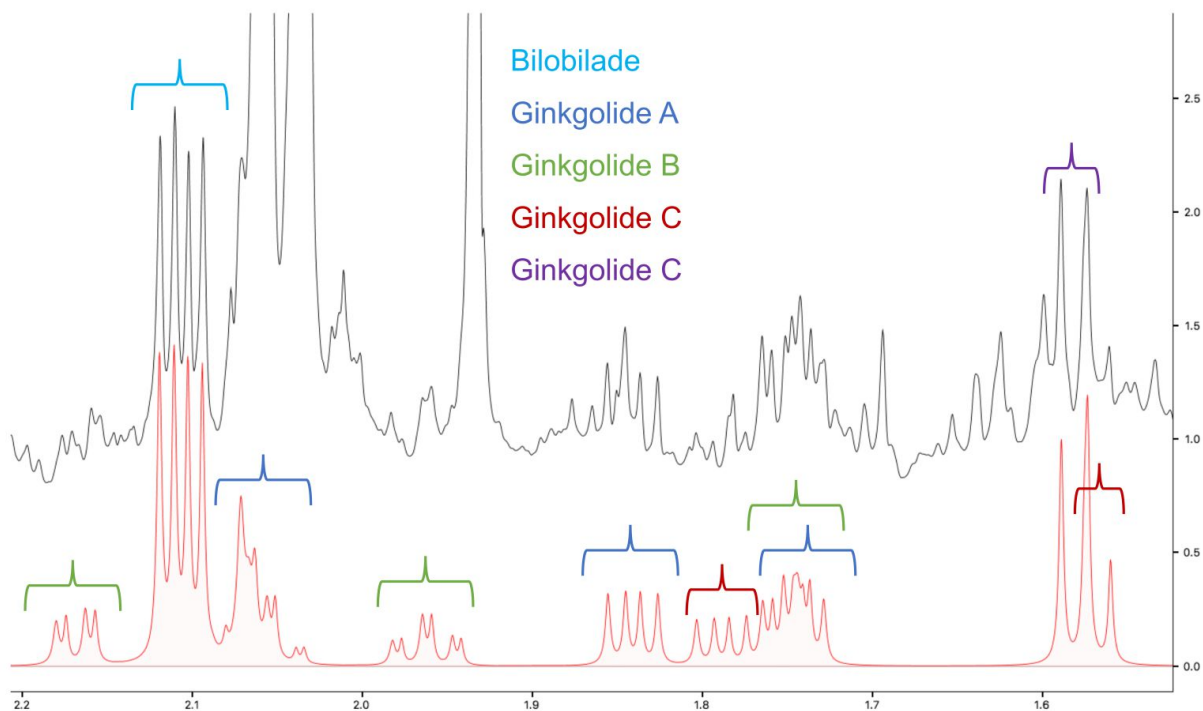

**Fig. S6** Example NMR analysis of GbE-U

Black lines indicate the NMR spectra, and red lines indicate standard compounds fit in the data

Colored braces indicate peaks from bilobilade (light blue), ginkgolide A (dark blue), ginkgolide B (green), ginkgolide C (maroon), ginkgolide J (purple)

X-axis is  $^1\text{H}$  ppm, and the y-axis is relative intensity.

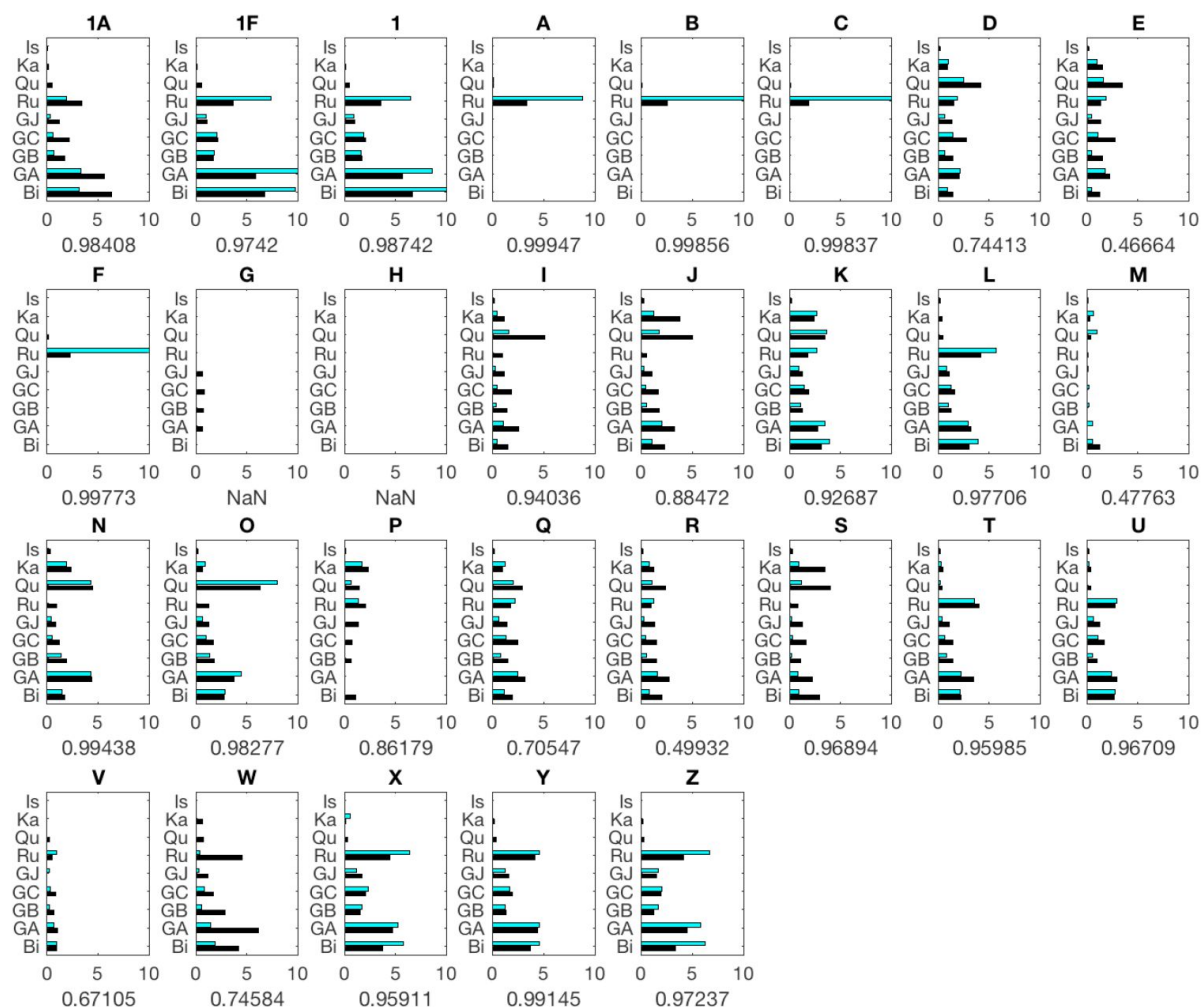

**Fig. S7** Direct comparisons of the LC and NMR results of weight percent

The 29 GbE samples are labeled at the top

The x-axis is weight percent of the compound of the total sample (g/g)

The y-axis shows the compound abbreviations: Is (Isorhamnetin), Ka (kaempferol), Qu (quercetin), Ru (rutin), GJ (ginkgolide J), GC (ginkgolide C), GB (ginkgolide B), GA (ginkgolide A), Bi (Bilobilade)

Cyan bars are the NMR measurement and black bars are the LC measurement

Below each graph is the correlation coefficient for all but Is, unless other values were zero where NaN is indicated.

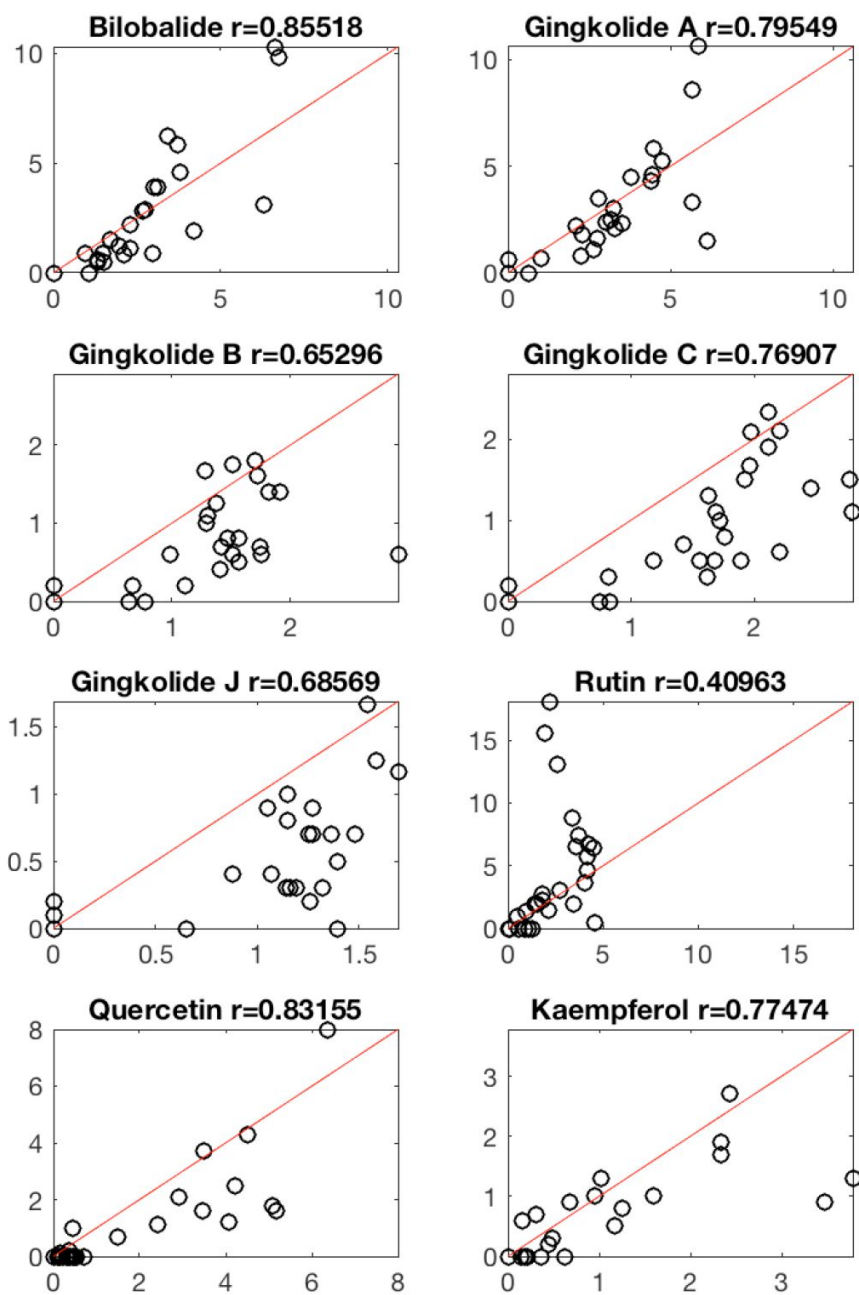

**Fig. S8** Comparison of the weight percent (ppm) measure by LS and NMR

The LC (x-axis) and NMR (y-axis) weight percent in ppm are compared for the 29 samples measured

The graphs are titled with the compound and correlation coefficient of the measurements
